# Supplementary material
Source: PubMed Central journal article supplement (PMC3682652)
Supplement: NIHMS462387-supplement-Figure.pdf [file NIHMS462387-supplement-Figure.pdf]

**GROUPS  
I-III**

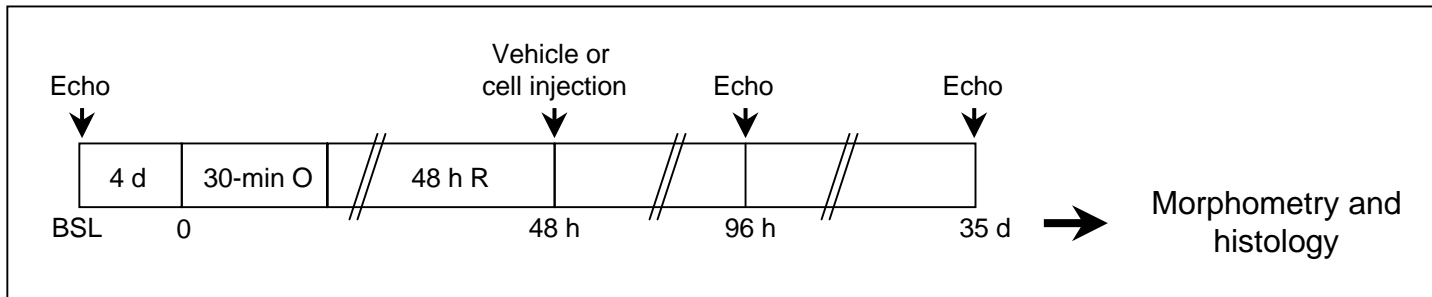

**SUPPLEMENTAL FIGURE 1**

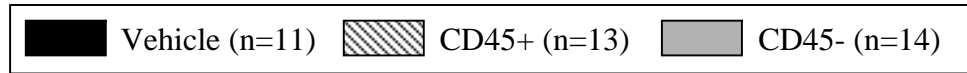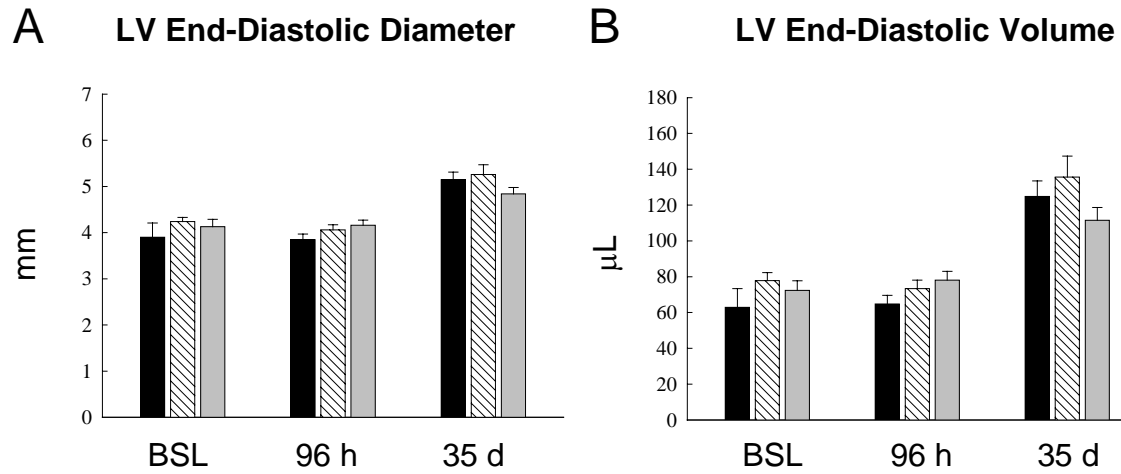

SUPPLEMENTAL FIGURE 2

**A**

Infarct Border Zone

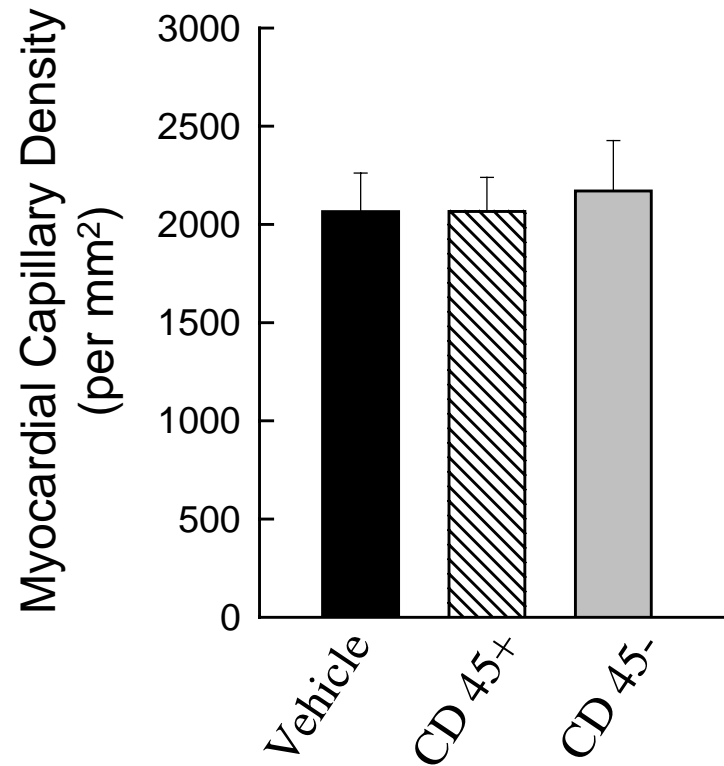**B**

Nonischemic Zone

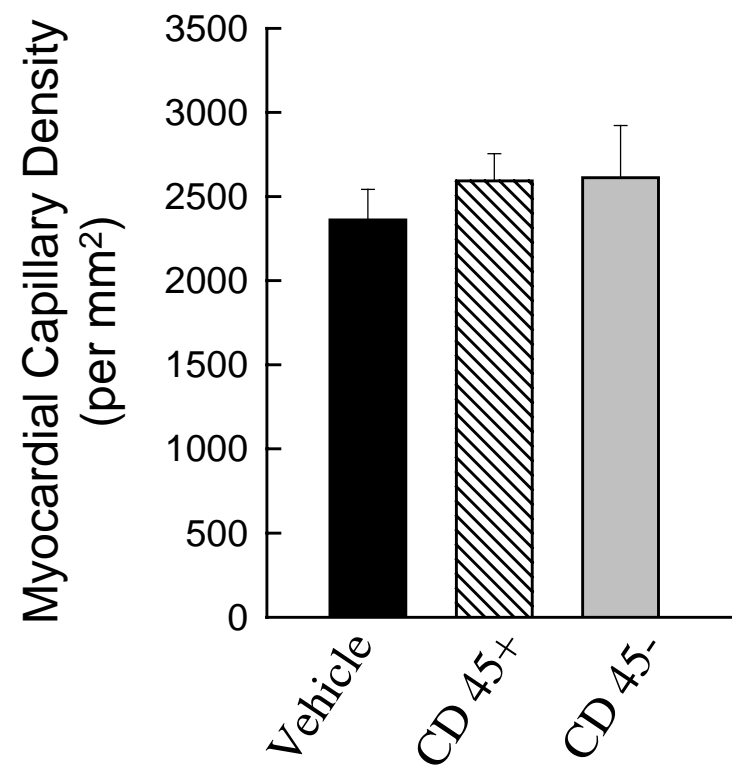

SUPPLEMENTAL FIGURE 3
