# Supplementary material
Source: PubMed Central journal article supplement (PMC3682652)
Supplement: NIHMS462387-supplement-Figure_Legends.pdf [file NIHMS462387-supplement-Figure_Legends.pdf]

## FIGURE LEGENDS (supplemental)

**Supplemental Figure 1. Experimental protocol.** Three groups of WT mice were used (groups I-III, n=11-14/group). Four days after a baseline echocardiogram, mice underwent a 30-min coronary occlusion followed by reperfusion. Forty-eight hours after MI, mice received intramyocardial injection of vehicle (group I), Sca-1+/Lin-/CD45+ hematopoietic stem cells (group II), or Sca-1+/Lin-/CD45- VSELs (group III). Echocardiograms were repeated at 48 h after cell transplantation and at 35 d after MI. At 35 d after MI, mice were sacrificed for morphometric and histologic studies.

**Supplemental Figure 2. Echocardiographic assessment of LV remodeling.** Panels **A** and **B** illustrate echocardiographic measurements of LV dimensions. Data are mean±SEM. n=11-14 mice per group.

**Supplemental Figure 3. Quantitative assessment of myocardial capillary density.** Myocardial capillary density in the infarct borderzone (**A**) and in the nonischemic zone (**B**). There was no significant difference among the vehicle-treated, CD45+ hematopoietic stem cell-treated, and VSEL-treated hearts. Data are mean±SEM. n=11-14 mice/group.
